# Supplementary material for: Striving for autonomy in everyday diabetes self-management—qualitative exploration via grounded theory approach
Source: PubMed Central journal article supplement — BMJ Open. 2021 Dec 24;11(12):e058885. doi: 10.1136/bmjopen-2021-058885 (PMC9066350; doi:10.1136/bmjopen-2021-058885), 2021-12-24
Supplement: bmjopen-2021-058885supp001.pdf [file bmjopen-2021-058885supp001.pdf]

**Supplemental material to:**  
**Striving for autonomy in everyday diabetes self-management: A grounded theory study**

Appendix 1

The full code tree:

| <b>Pathways toward everyday experiences of self-directedness</b>                | <b>Core category</b> |
|---------------------------------------------------------------------------------|----------------------|
| <b>1. Facing threats</b>                                                        | <b>Selective</b>     |
| 1. 1. Dealing with the ‘insidious killer’ (hyperglycaemia)                      | Axial                |
| <i>1. 1. 1. ‘The illness will not change my life’</i>                           | <i>Open</i>          |
| <i>1. 1. 2. Avoiding stressful relationships</i>                                | <i>Open</i>          |
| <i>1. 1. 3. ‘You have to learn to live with it’</i>                             | <i>Open</i>          |
| 1. 2. Coping with the threat of coma (hypoglycaemia)                            | Axial                |
| <i>1. 2. 1. Autonomy and loneliness</i>                                         | <i>Open</i>          |
| <i>1. 2. 2. Night preparedness</i>                                              | <i>Open</i>          |
| <i>1. 2. 3. Autonomy on the road</i>                                            | <i>Open</i>          |
| 1. 3. Dealing with the ‘military regime’ (treatment and diet)                   | Axial                |
| <i>1. 3. 1. Autonomy in a narrowed living space</i>                             | <i>Open</i>          |
| <i>1. 3. 2. Autonomy in the face of the threat of ‘madness’</i>                 | <i>Open</i>          |
| <i>1. 3. 3. Patience in captivity</i>                                           | <i>Open</i>          |
| <b>2. Constructing protective space and time</b>                                | <b>Selective</b>     |
| 2. 1. Protection for mealtimes                                                  | Axial                |
| <i>2. 1. 1. Creation of protected time in the family</i>                        | <i>Open</i>          |
| <i>2. 1. 2. Risky explanation in the workplace</i>                              | <i>Open</i>          |
| <i>2. 1. 3. A retreat that provides protection in the workplace</i>             | <i>Open</i>          |
| 2. 2. Protection against ‘stigma’                                               | Axial                |
| <i>2. 2. 1. Supported patient education</i>                                     | <i>Open</i>          |
| <i>2. 2. 2. Hiding the injection to protect others</i>                          | <i>Open</i>          |
| <i>2. 2. 3. ‘They still think I’m taking drugs’</i>                             | <i>Open</i>          |
| <i>2. 2. 4. Creating a protected space at home</i>                              | <i>Open</i>          |
| <i>2. 2. 5. Creating a protected space anywhere: social and self-acceptance</i> | <i>Open</i>          |
| <b>3. Constructing everyday experiences of self-directedness</b>                | <b>Selective</b>     |
| 3. 1. Attitude towards own body: attention and concealment                      | Axial                |
| <i>3. 1. 1. Concealment of the disease from yourself</i>                        | <i>Open</i>          |
| <i>3. 1. 2. Conscience and internal negotiation</i>                             | <i>Open</i>          |
| <i>3. 1. 3. Learning bodily signals</i>                                         | <i>Open</i>          |
| <i>3. 1. 4. Physical processes that can be planned with insulin treatment</i>   | <i>Open</i>          |
| 3. 2. Difficulties in assertiveness                                             | Axial                |
| <i>3. 2. 1. Illness is not a topic</i>                                          | <i>Open</i>          |
| <i>3. 2. 2. Lonely decision</i>                                                 | <i>Open</i>          |
| <i>3. 2. 3. Fighting in close relationships: ‘as an eccentric’</i>              | <i>Open</i>          |
| <i>3. 2. 4. Strength giving service</i>                                         | <i>Open</i>          |

|                                                                                                           |             |
|-----------------------------------------------------------------------------------------------------------|-------------|
| 3. 3. Influencing each other's attitude                                                                   | Axial       |
| 3. 3. 1. <i>Showing an example</i>                                                                        | <i>Open</i> |
| 3. 3. 2. <i>The patient learns from family members</i>                                                    | <i>Open</i> |
| 3. 3. 3. <i>Family members learn from the patient</i>                                                     | <i>Open</i> |
| 3. 3. 4. <i>Social circles of other patients are supportive: 'ear and eyewitnesses of the condition'</i>  | <i>Open</i> |
| 3. 4. <i>Shared control: 'This is the life of the family'</i>                                             | Axial       |
| 3. 4. 1. <i>Accepting control from adult children</i>                                                     | <i>Open</i> |
| 3. 4. 2. <i>Control and cooperation in a relationship: 'My big brake'</i>                                 | <i>Open</i> |
| 3. 4. 3. <i>Shared control is a burden on the family</i>                                                  | <i>Open</i> |
| 3. 5. At the doctor's: cheating, giving up or partnering                                                  | Axial       |
| 3. 5. 1. <i>Missing guidance from the doctor: 'I should have been hit in the head sometimes'</i>          | <i>Open</i> |
| 3. 5. 2. <i>Accepting medical control by giving up your control</i>                                       | <i>Open</i> |
| 3. 5. 3. <i>Hiding own 'corrected treatment': 'I know it's a cheating, but then at least you can eat'</i> | <i>Open</i> |
| 3. 5. 4. <i>Partnership by undertaking 'corrected treatment'</i>                                          | <i>Open</i> |
| 3. 5. 5. <i>Partnership by negotiation</i>                                                                | <i>Open</i> |
