# Supplementary material for: Striving for autonomy in everyday diabetes self-management—qualitative exploration via grounded theory approach
Source: PubMed Central journal article supplement — BMJ Open. 2021 Dec 24;11(12):e058885. doi: 10.1136/bmjopen-2021-058885 (PMC9066350; doi:10.1136/bmjopen-2021-058885), 2021-12-24
Supplement: bmjopen-2021-058885supp002.pdf [file bmjopen-2021-058885supp002.pdf]

**Supplemental material to:****Striving for autonomy in everyday diabetes self-management: A grounded theory study**

## Appendix 2

## The interview topic guide

## 1. Disease history

Changes your daily routine / family life / social relationships / work / leisure / relationship with own body since the diagnosis of T2D.

Lifestyle: changes attributed to the illness and the treatment.

Experiences of autonomy and control in change management.

## 2. Current treatment regime

Positive and negative experiences in disease management.

Experiences of autonomy and control in the doctor-patient relationship.

The patient's role in decision making on the treatment regime.

Current lifestyle: positive and negative experiences related to autonomy in everyday life.

## 3. The ecological context of the treatment

The role of close relationships / extended social environment / physical environment in the disease management / treatment.

Positive and negative treatment-related experiences in the social context of the treatment (at home, at work, when travelling).

Treatment-related experiences of autonomy in the social environment.

Experiences of social support, dependence and independence related to the treatment.
